# Supplementary material for: Mesoporous silica based reservoir for the active protection of mild steel in an aggressive chloride ion environment
Source: Royal Society of Chemistry journal article supplement (doi:10.1039/c5ra04670j), 2015-01-01
Supplement: c5ra04670j1.pdf [file c5ra04670j1.pdf]

## Mesoporous silica based reservoir for active protection of mild steel in aggressive chloride ion environment.

T.Siva, M.sunder, S.S. Sreejakumari, S.Sathiyarayanan\*

### Supplementary information

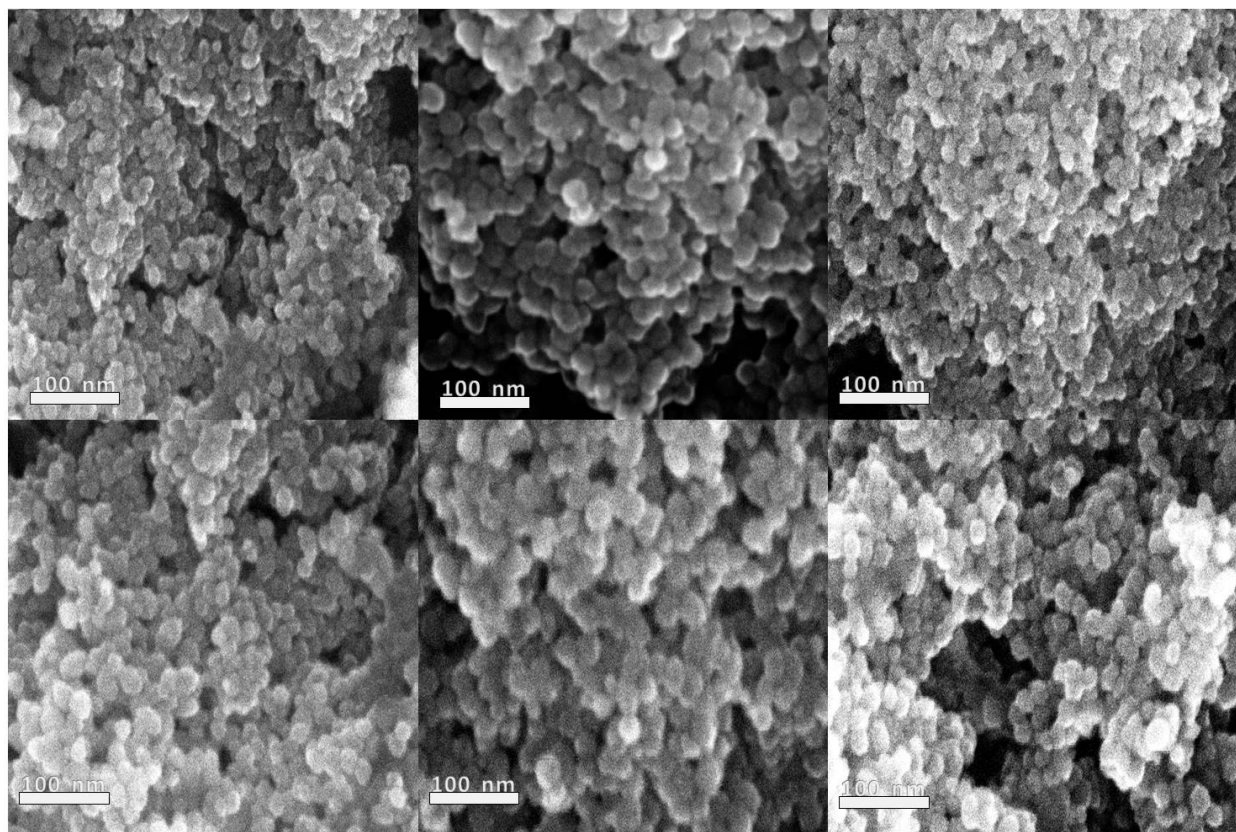

Fig.S1 SEM images of mesoporous SiO<sub>2</sub>

Fig. S1 shows the SEM images of the samples after calcinations. Well dispersed spheres could be observed for the calcinated sample.

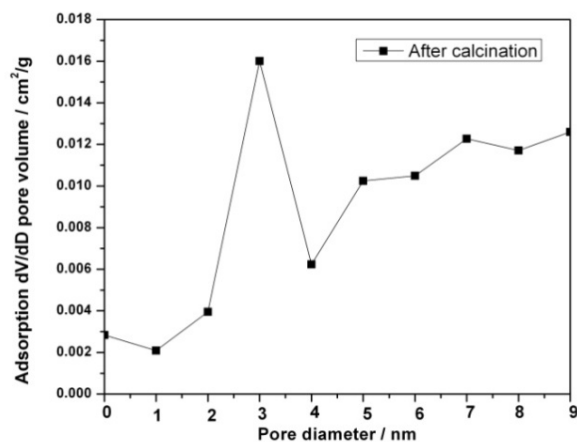

Fig.S2 BJH pore size distribution plot of mesoporous SiO<sub>2</sub>

## 2.1 FTIR analysis of mesoporous SiO<sub>2</sub>

The FTIR analysis of mesoporous SiO<sub>2</sub> is shown in Fig. S3. The peak at 3390 cm<sup>-1</sup> is due to the OH stretching vibration of associated water molecule. Then the stretching vibration of Si-O-Si bond occurs at 1091 cm<sup>-1</sup>. The peak at 948 cm<sup>-1</sup> is due to the residual organic group and results in asymmetric vibration of Si-OH bonding. The vibration of Si-O occurs at 798 cm<sup>-1</sup> and O-Si-O bonding is shifted towards lower wave numbers. The bond at 1490 cm<sup>-1</sup> is related to the asymmetric scissoring mode of vibration of CTAB. After calcination this peak disappeared.

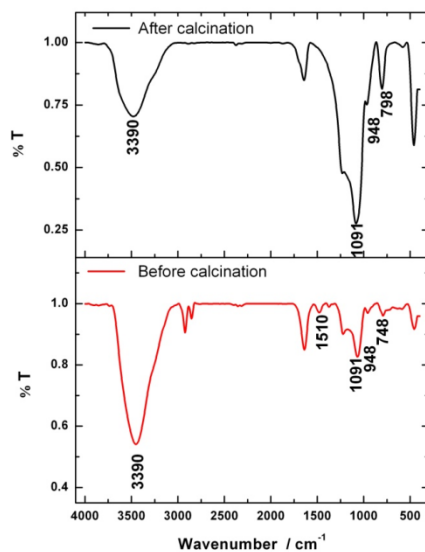

Fig.S3 FTIR analysis of mesoporous SiO<sub>2</sub>
